# Supplementary material
Source: publisher site journal article supplement (http://www.kjim.org/upload/media/kjim-2023-357-Supplementary-Fig-4.pdf)

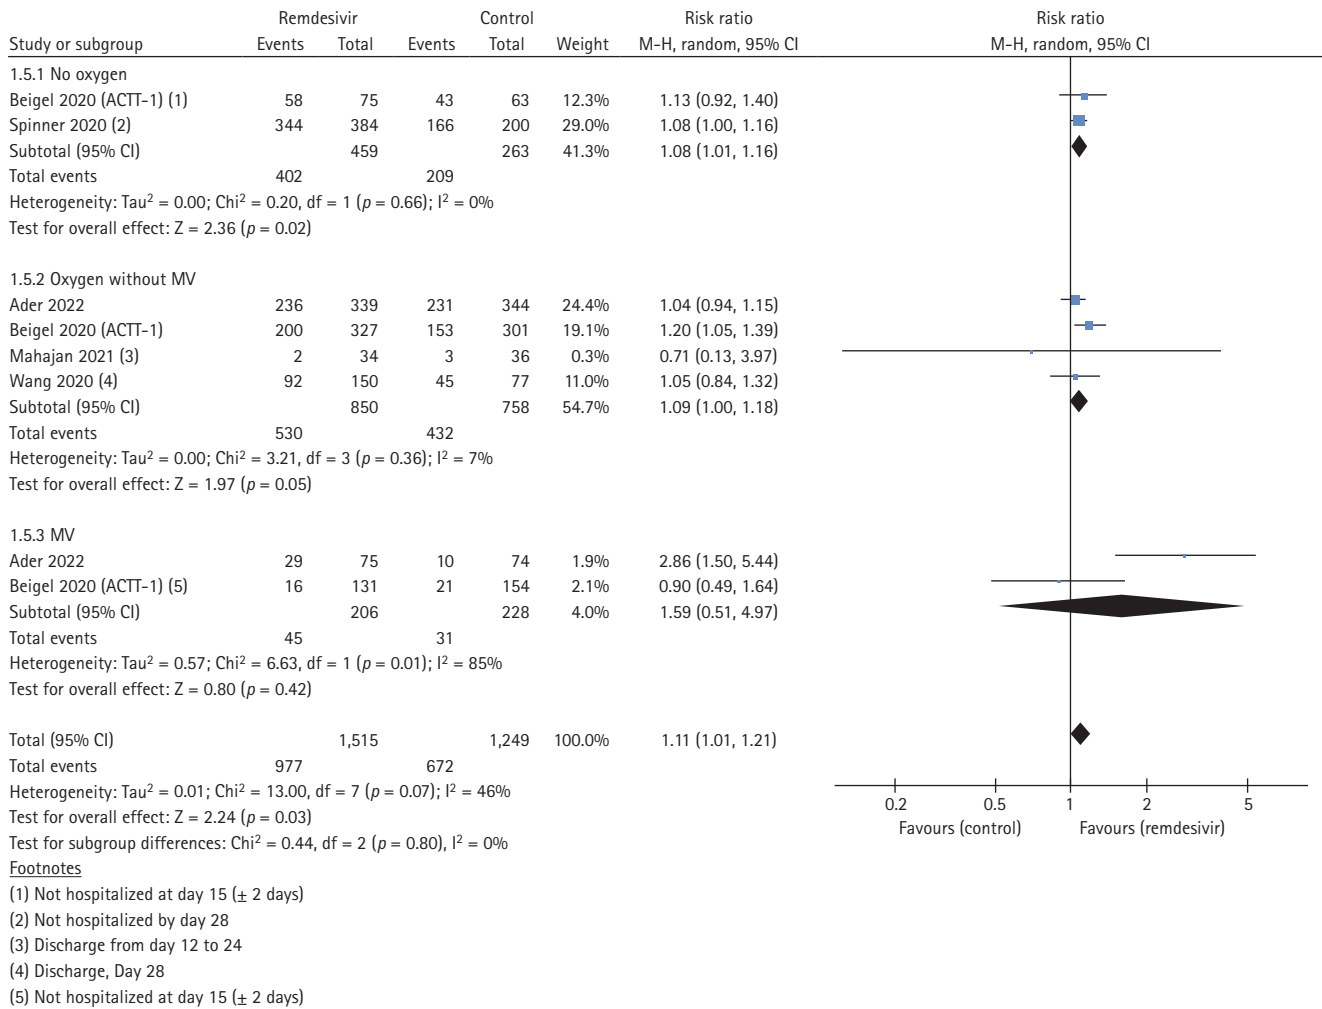

**Supplementary Figure 4.** Forest plot of discharge.

Supplement: Supplementary file 1 [file kjim-2023-357-Supplementary-Fig-4.pdf]
